# Supplementary material for: Self-Assembled Matrine-PROTAC Encapsulating Zinc(II) Phthalocyanine with GSH-Depletion-Enhanced ROS Generation for Cancer Therapy
Source: MDPI journal article supplement (doi:10.3390/molecules29081845), 2024-04-18
Supplement: s1 [file s1]

# **Self-assembled matrine-PROTAC encapsulating zinc(II)**

## **phthalocyanine with GSH depletion enhanced**

### **ROS generation for cancer therapy**

**Sitong Lai <sup>1,†</sup>, Bing Wang <sup>2,†</sup>, Kunhui Sun <sup>2</sup>, Fan Li <sup>1</sup>, Qian Liu <sup>1</sup>, Xie-an Yu <sup>2</sup>, Lihe Jiang <sup>3,4\*</sup>  
and Lisheng Wang <sup>1,\*</sup>**

<sup>1</sup> School of medicine, Guangxi University, Nanning, 530004, China; [LaiSitong0718@163.com](mailto:LaiSitong0718@163.com) (S.L.); [lifanffff@163.com](mailto:lifanffff@163.com); (F.L.); [lq622727@126.com](mailto:lq622727@126.com) (Q.L.)

<sup>2</sup> NMPA Key Laboratory for Quality Research and Evaluation of Traditional Chinese Medicine, Shenzhen Institute for Drug Control, Shenzhen 518057, China; [wangbingszyj@163.com](mailto:wangbingszyj@163.com) (B.W.); [sunkunhuilst@163.com](mailto:sunkunhuilst@163.com) (K.S.)

<sup>3</sup> School of Basic Medical Sciences, Youjiang Medical University for Nationalities, Baise, 533000, Guangxi, P.R. China

<sup>4</sup> Shenzhen Key Laboratory of Southern Subtropical Plant Diversity, FairyLake Botanical Garden, Shenzhen & Chinese Academy of Science, Shenzhen 518004, China

\* Correspondence: [jianglihe@ymun.edu.cn](mailto:jianglihe@ymun.edu.cn) (L.J.); [lswang@gxu.edu.cn](mailto:lswang@gxu.edu.cn) (L.W.)

<sup>†</sup> These authors contributed equally to this work.

## 1. Supplementary Figures

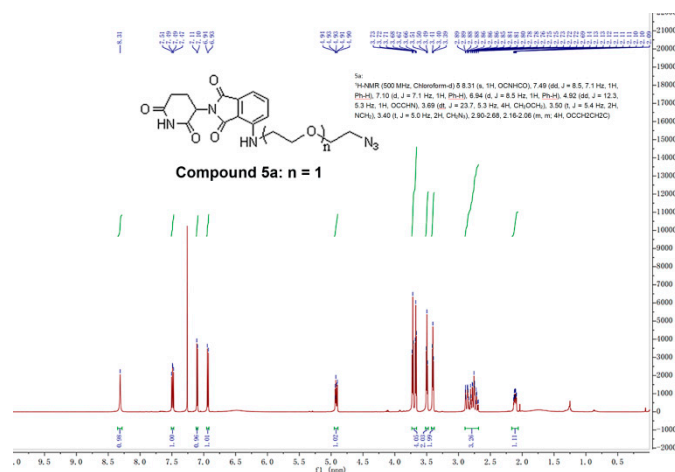

**Figure S1.**  $^1\text{H}$ -NMR spectrum of compound 5a (The solvent is Chloroform-d).

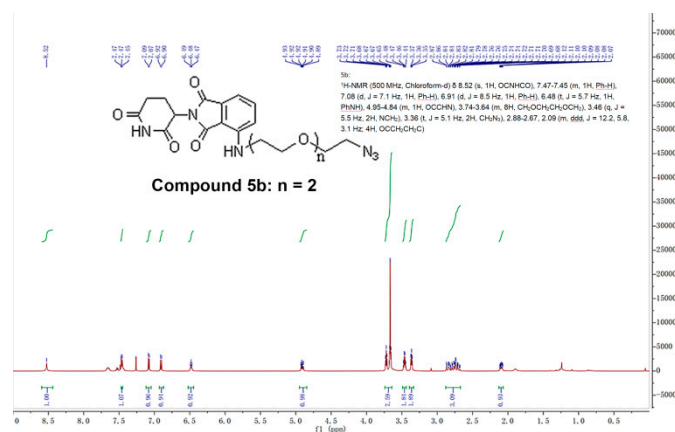

**Figure S2.**  $^1\text{H}$ -NMR spectrum of compound 5b (The solvent is Chloroform-d).

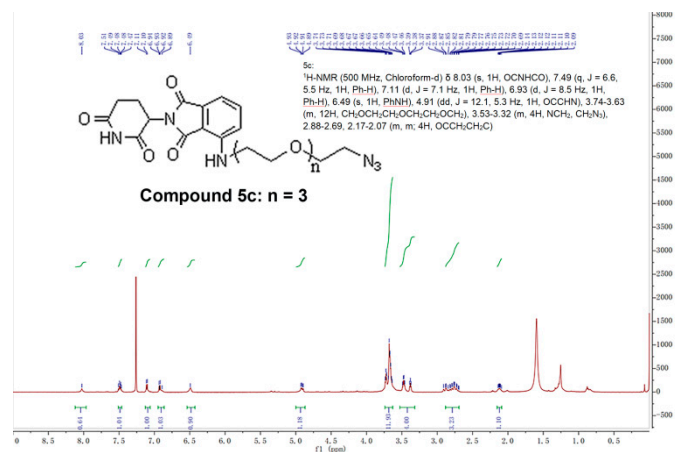

**Figure S3.**  $^1\text{H}$ -NMR spectrum of compound 5c (The solvent is Chloroform-d).

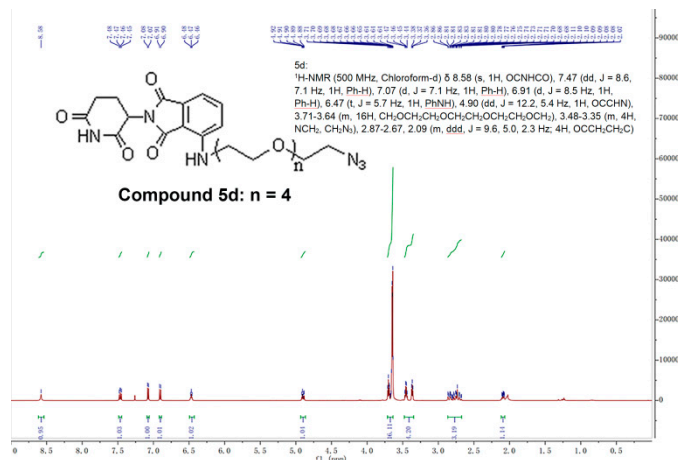

**Figure S4.**  $^1\text{H}$ -NMR spectrum of compound 5d (The solvent is Chloroform-d).

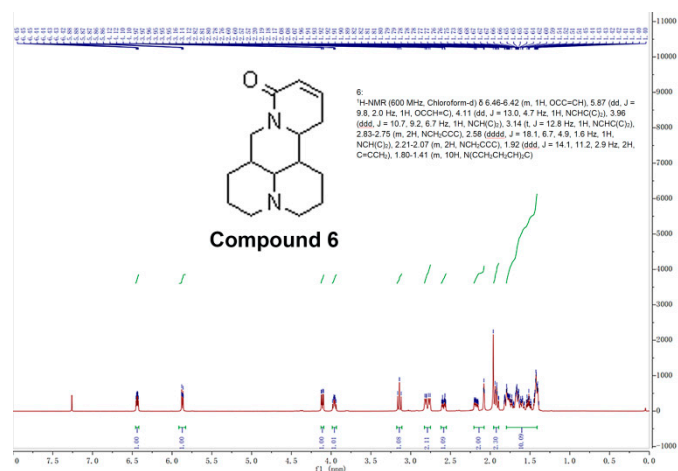

**Figure S5.**  $^1\text{H}$ -NMR spectrum of compound 6 (The solvent is Chloroform-d).

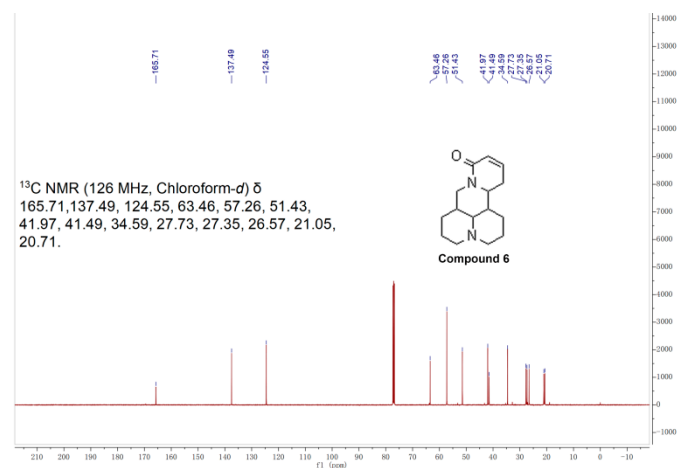

**Figure S6.**  $^{13}\text{C}$ -NMR spectrum of compound 6 (The solvent is Chloroform-d).

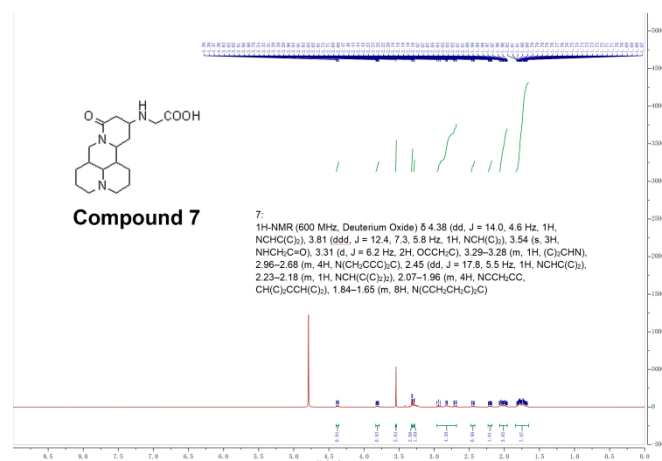

**Figure S7.** <sup>1</sup>H-NMR spectrum of compound 7 (The solvent is Deuterium Oxide).

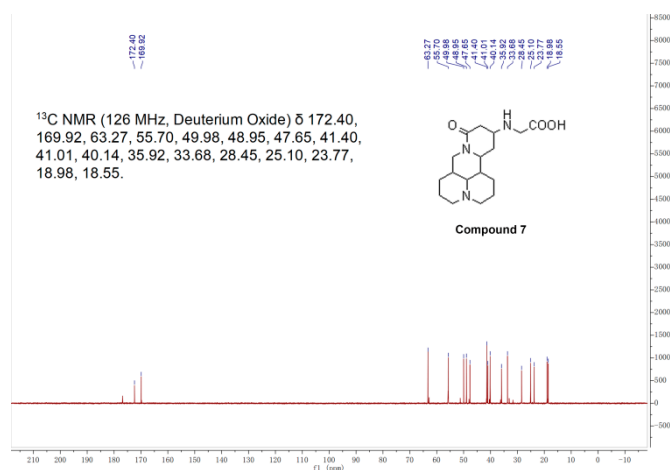

**Figure S8.** <sup>13</sup>C-NMR spectrum of compound 7 (The solvent is Deuterium Oxide).

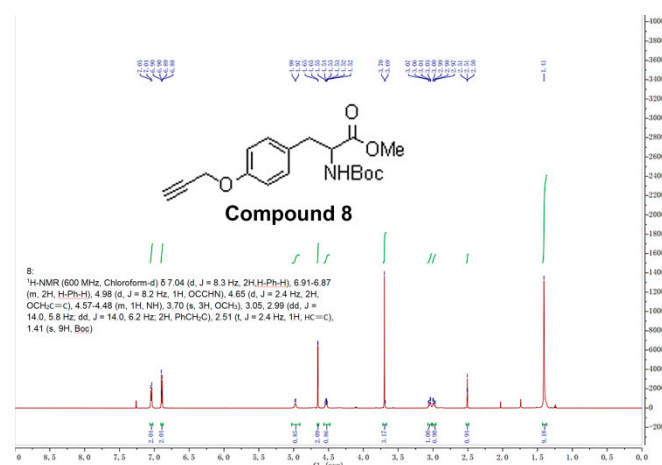

**Figure S9.** <sup>1</sup>H-NMR spectrum of compound 8 (The solvent is Chloroform-d).

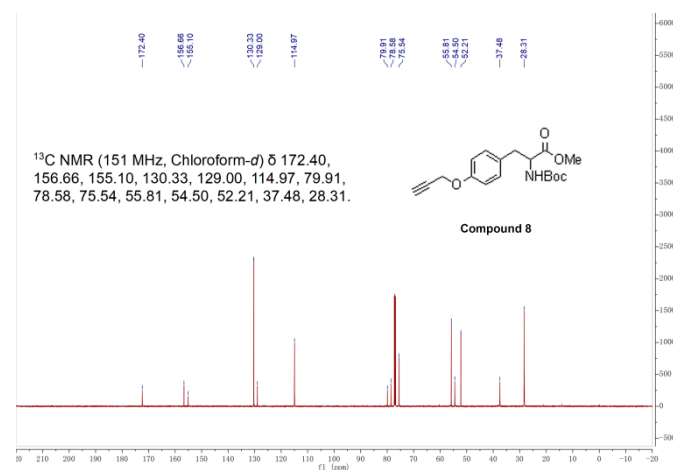

Figure S10. <sup>13</sup>C-NMR spectrum of compound 8 (The solvent is Chloroform-d).

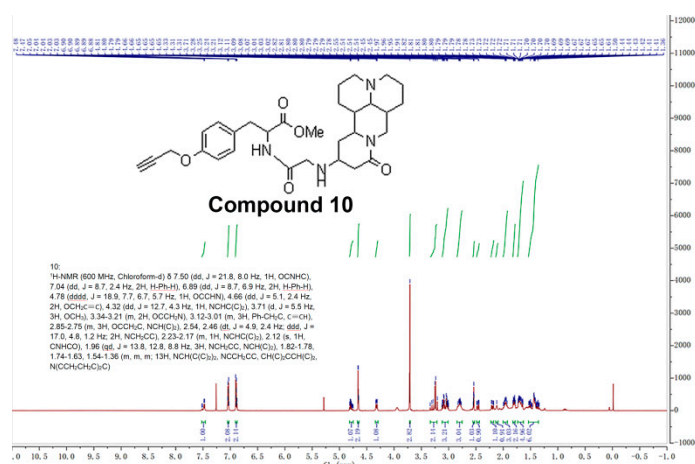

Figure S11. <sup>1</sup>H-NMR spectrum of compound 10 (The solvent is Chloroform-d).

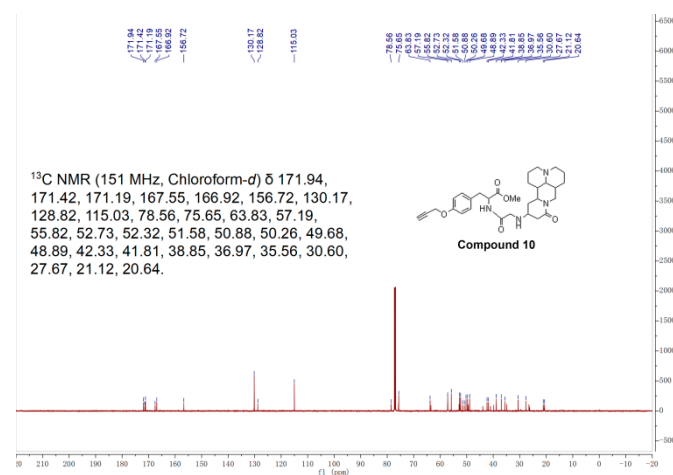

Figure S12. <sup>13</sup>C-NMR spectrum of compound 10 (The solvent is Chloroform-d).

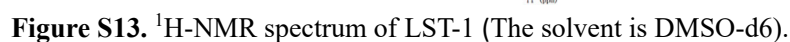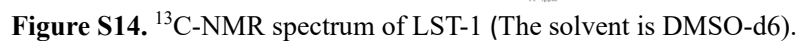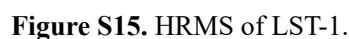

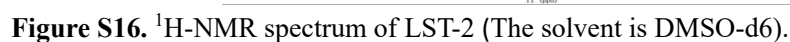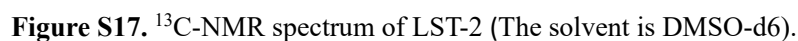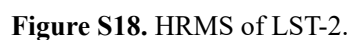





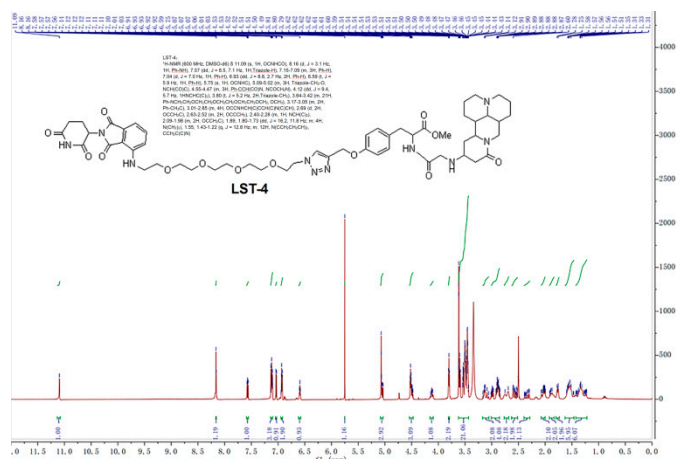

Figure S22.  $^1\text{H}$ -NMR spectrum of LST-4 (The solvent is DMSO- $d_6$ ).

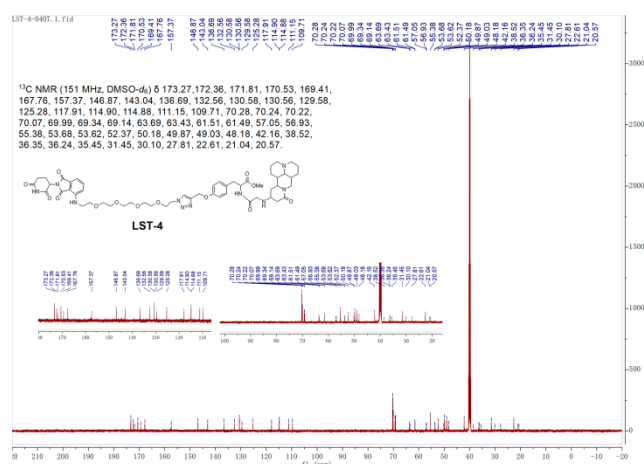

Figure S23.  $^{13}\text{C}$ -NMR spectrum of LST-4 (The solvent is DMSO- $d_6$ ).

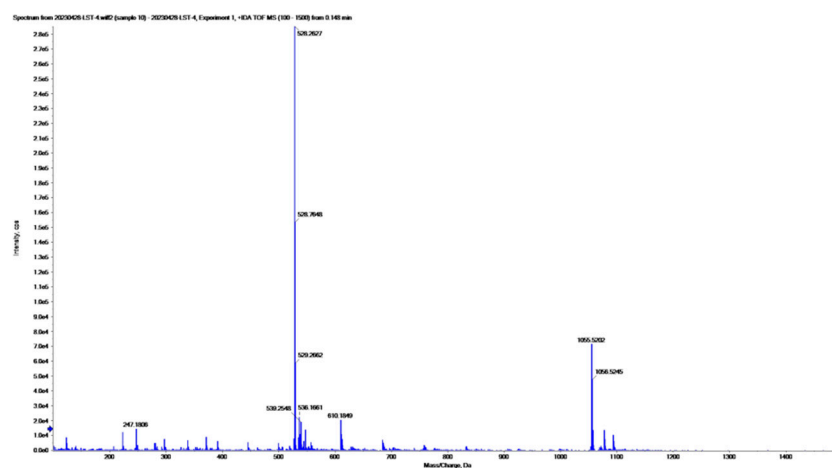

Figure 24. HRMS of LST-4.

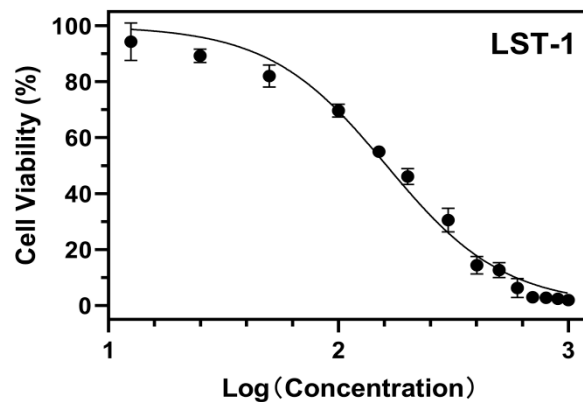

**Figure S25.** The dose-dependent inhibition curves of LST-1 (The unit of concentration:  $\mu\text{M}$ ) (n=4).

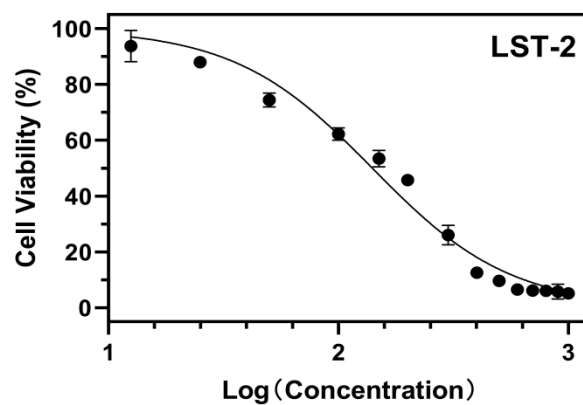

**Figure S26.** The dose-dependent inhibition curves of LST-2 (The unit of concentration:  $\mu\text{M}$ ) (n=4).

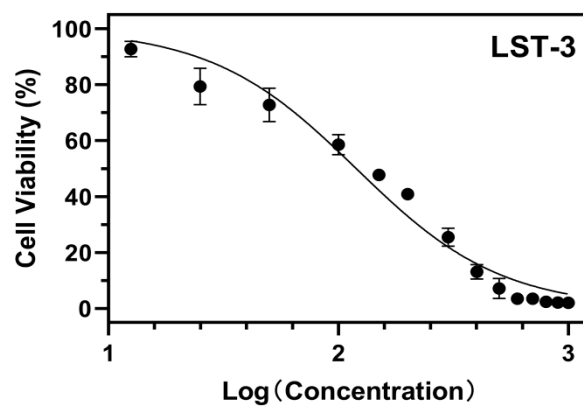

**Figure S27.** The dose-dependent inhibition curves of LST-3 (The unit of concentration:  $\mu\text{M}$ ) (n=4).

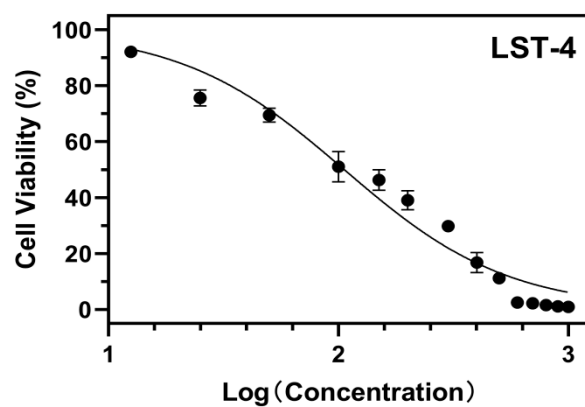

**Figure S28.** The dose-dependent inhibition curves of LST-4 (The unit of concentration:  $\mu\text{M}$ ) (n=4).

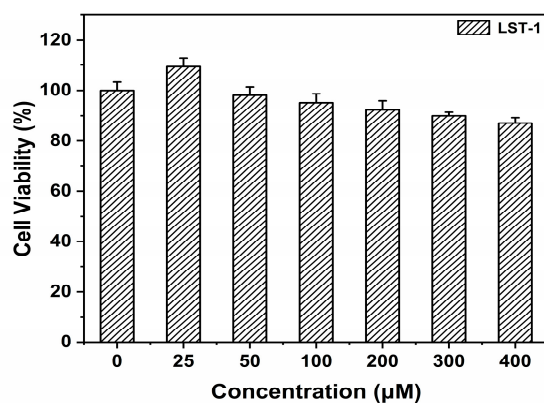

**Figure S29.** Viability of L02 cells treated with various concentrations of LST-1 (n=4).

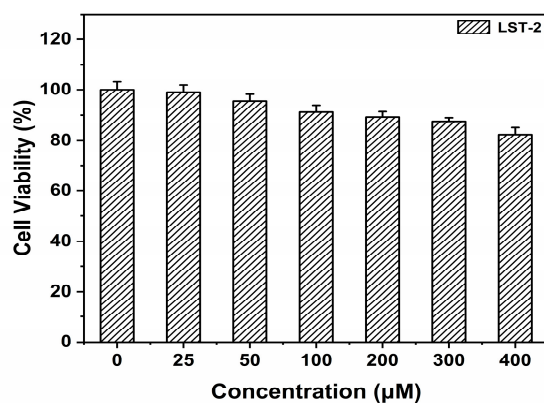

**Figure S30.** Viability of L02 cells treated with various concentrations of LST-2 (n=4).

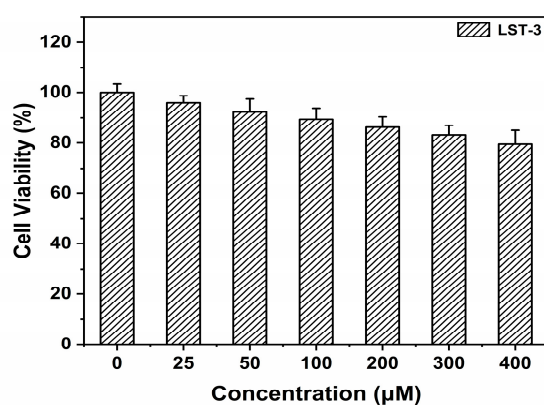

**Figure S31.** Viability of L02 cells treated with various concentrations of LST-3 (n=4).

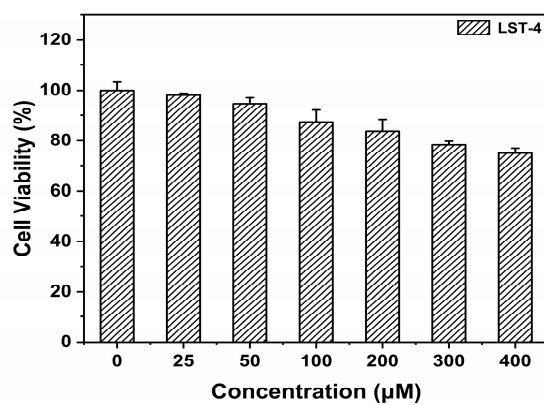

**Figure S32.** Viability of L02 cells treated with various concentrations of LST-4 (n=4).

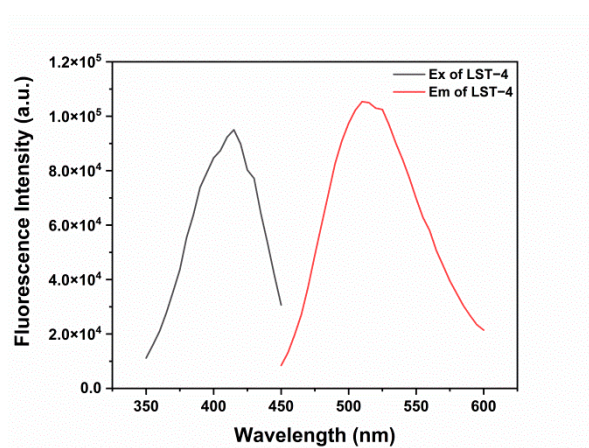

**Figure S33.** Excitation and emission wavelengths of LST-4 from a microplate reader.

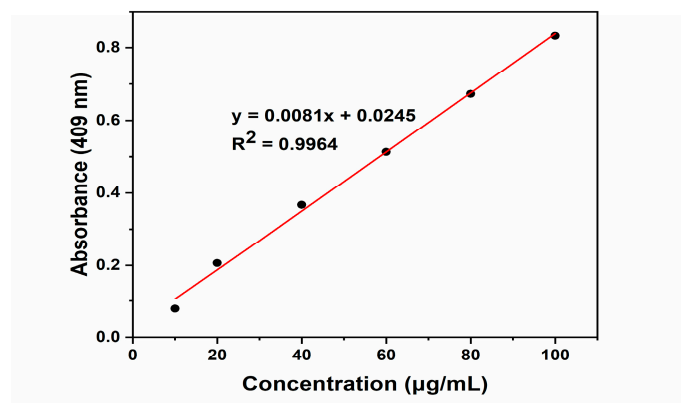

**Figure S34.** The liner plot of the absorbance of LST-4 in the wavelength of the maximum absorption as a function of concentration.

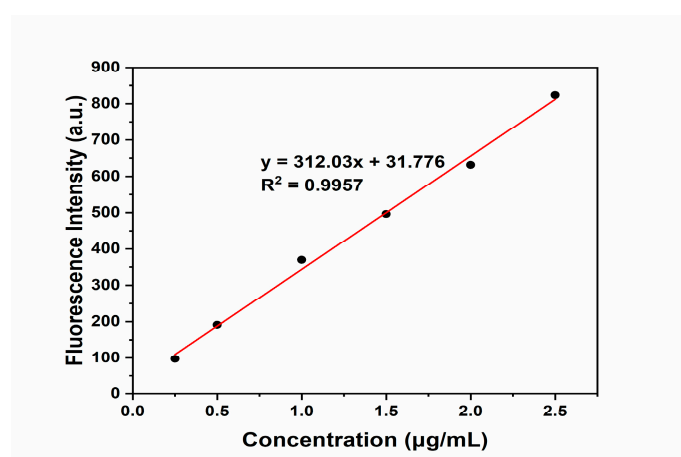

**Figure S35.** The line graph of the FL intensity of LST-4 with  $\lambda_{\text{Ex}} = 503 \text{ nm}$  as a function of concentration.

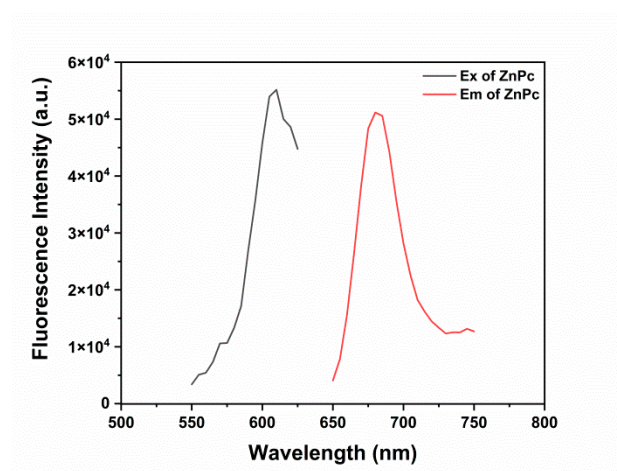

**Figure S36.** Excitation and emission wavelengths of ZnPc from a microplate reader.

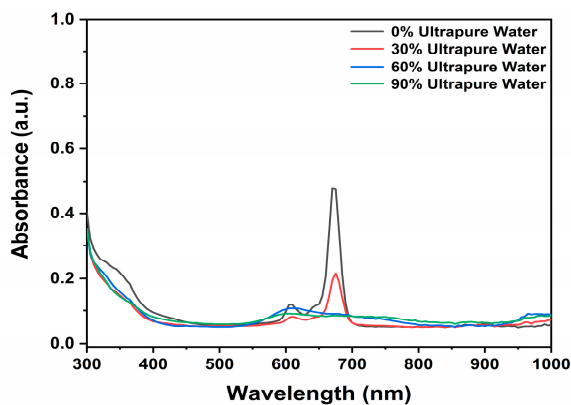

**Figure S37.** UV-Vis absorption spectra of ZnPc in water/DMSO mixtures with different water fractions.

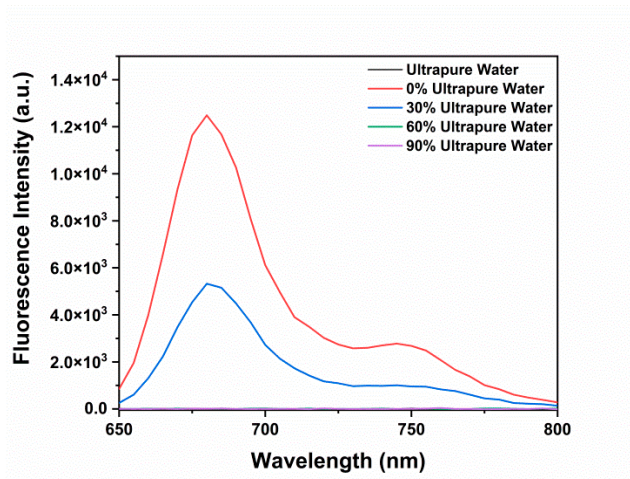

**Figure S38.** Fluorescence spectra of ZnPc in water/DMSO mixtures with different water fractions.

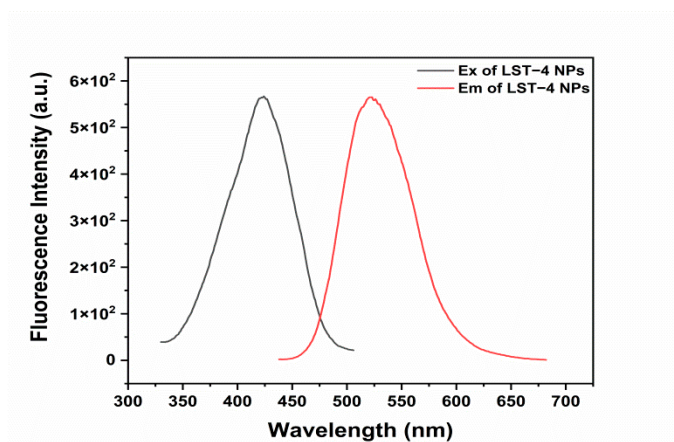

**Figure S39.** Excitation and emission wavelengths of LST-4 NPs from UV-2450 spectrophotometer (Shimadzu, Tokyo, Japan).

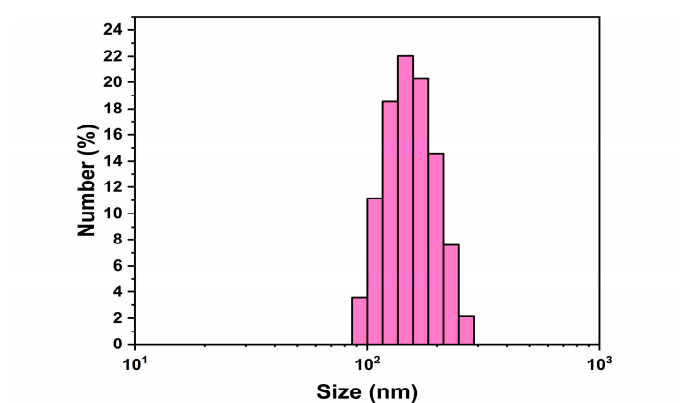

**Figure S40.** Size distribution of LST-4 NPs.

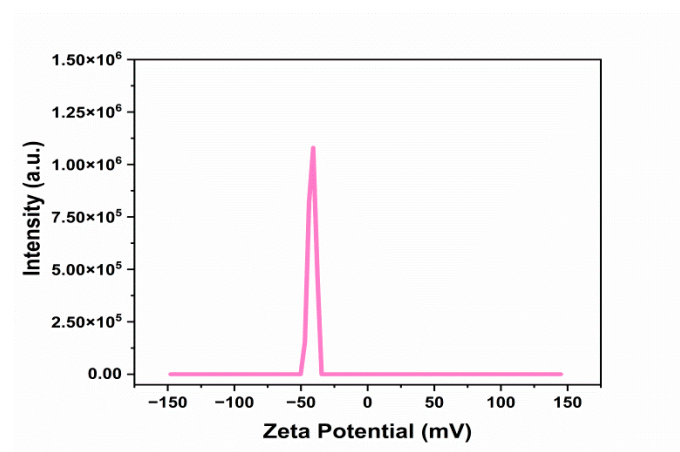

**Figure S41.** Zeta potentials of LST-4 NPs.

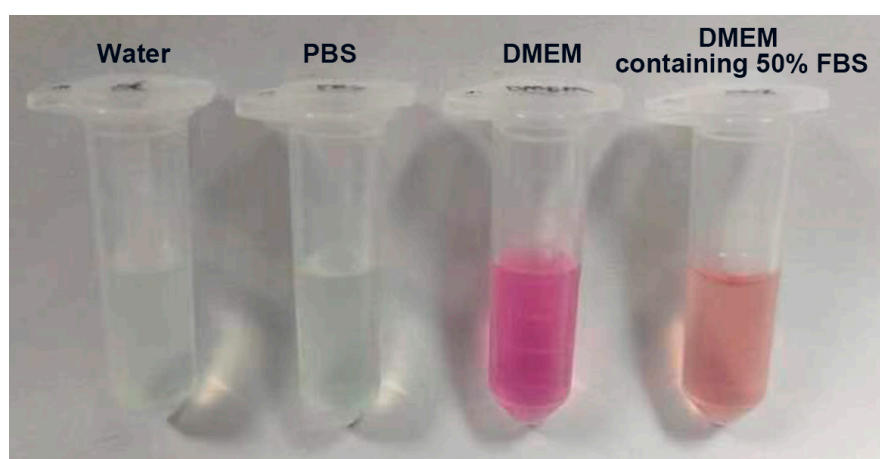

**Figure S42.** Solution state of LST-4 NPs incubated in water, PBS, DMEM and 50% FBS for 24 h.

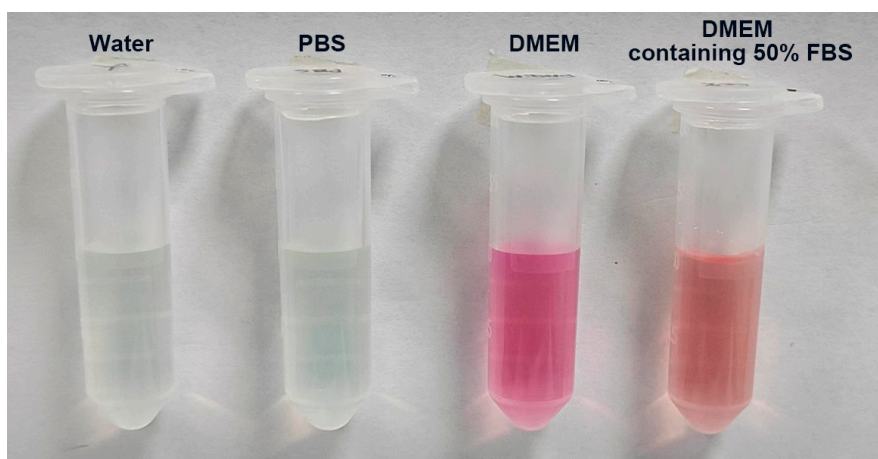

**Figure S43.** Solution state of LST-4@ZnPc NPs incubated in water, PBS, DMEM and 50% FBS for 24 h.

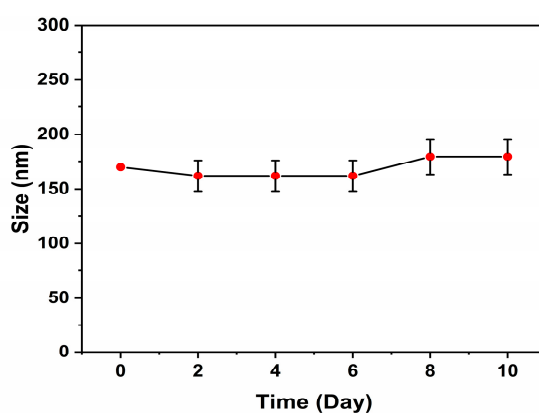

**Figure S44.** The measurement of particle size of LST-4@ZnPc NPs within 10 days under 4°C (n=3).

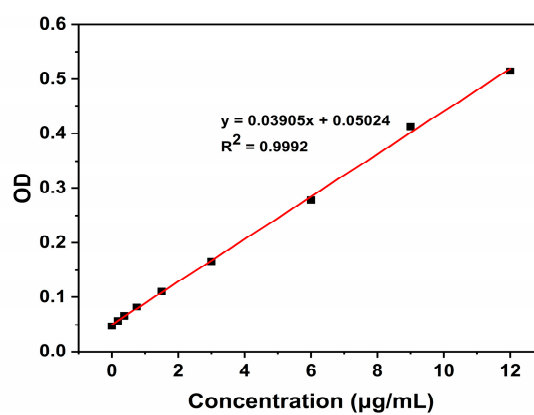

**Figure S45.** Standard curve of ZnPc in 5:1 (v/v) DMSO:water mixture (n=3).



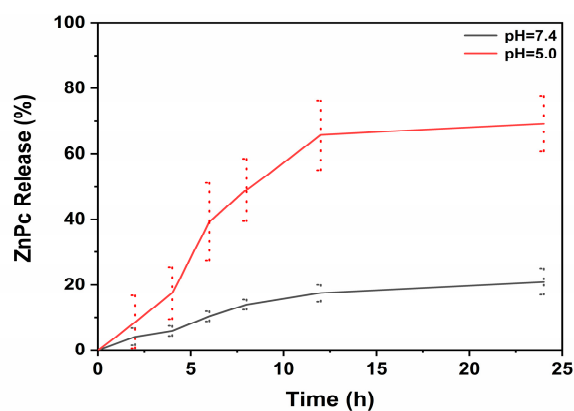

**Figure S46.** Release of ZnPc from LST-4@ZnPc NPs at pH 7.4 and 5.0 (n=3).

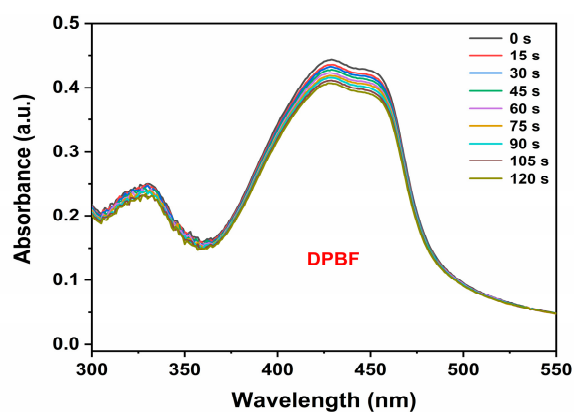

**Figure S47.** The UV-vis spectra of DPBF in DMSO for different irradiation times under 690 nm laser irradiation (0.2 W/cm<sup>2</sup>).

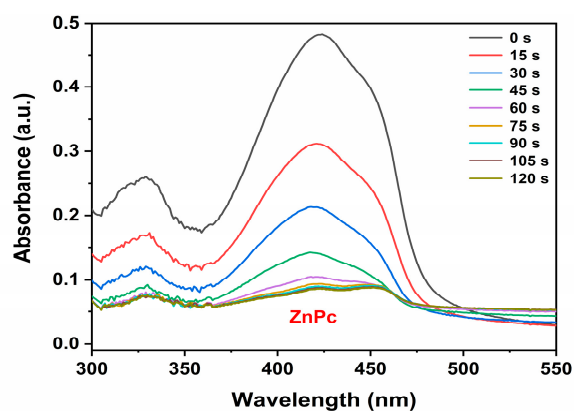

**Figure S48.** The UV-Vis spectra of DPBF containing ZnPc for different irradiation times.

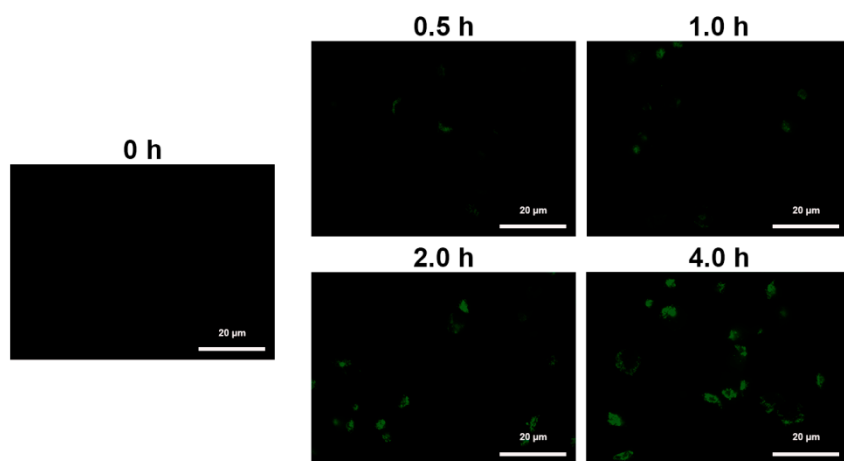

**Figure S49.** Cell uptake of LST-4 NPs by HepG2 cells with for different incubation times (0, 0.5, 1, 2, 4 h). The green fluorescence represents LST-4 NPs. (Scale bar represents 20  $\mu\text{m}$ .)

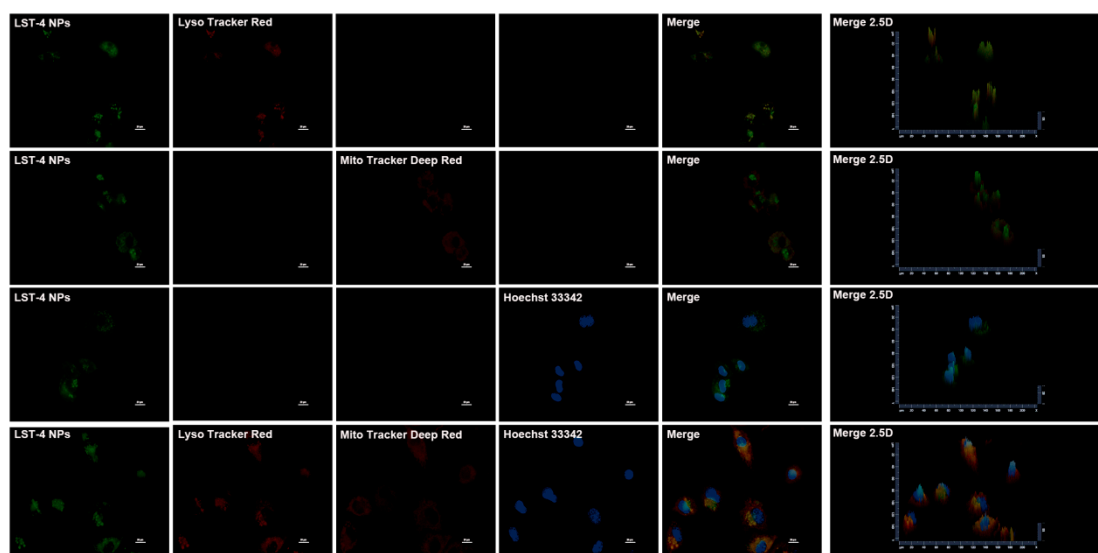

**Figure S50.** Confocal fluorescence images of HepG2 cells stained with LysoTracker Red, Mito Tracker Deep Red and Hoechst 33342 following incubation with LST-4 NPs for 4 h. (Scale bar represents 20  $\mu\text{m}$ .)

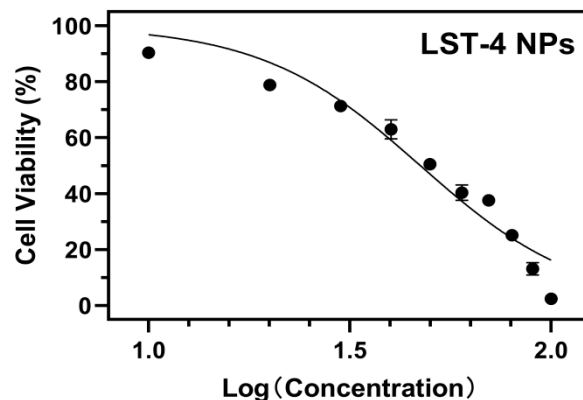

**Figure S51.** The dose-dependent inhibition curves of LST-4 NPs (The unit of concentration:  $\mu\text{g/mL}$ ) ( $n=4$ ).

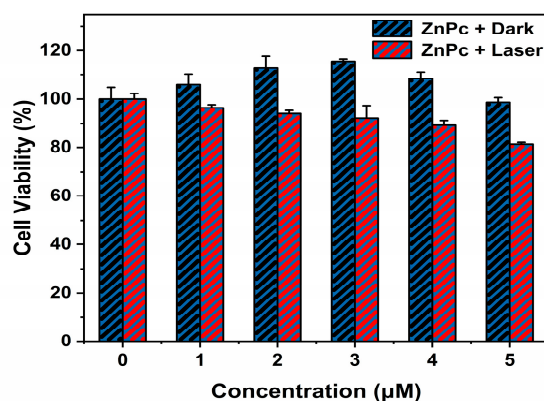

**Figure S52.** Viability of HepG2 cells treated with various concentrations of ZnPc in dark or upon exposure to laser radiation (a 690 nm laser ( $0.2 \text{ W/cm}^2$ , 5 min)) ( $n=4$ ).

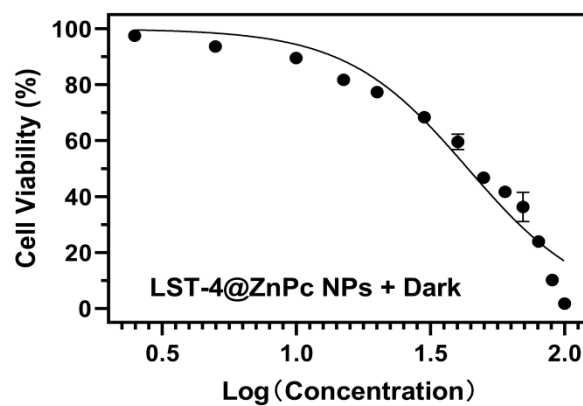

**Figure S53.** The dose-dependent inhibition curves of LST-4@ZnPc NPs in dark (The unit of concentration:  $\mu\text{g/mL}$ ) ( $n=4$ ).

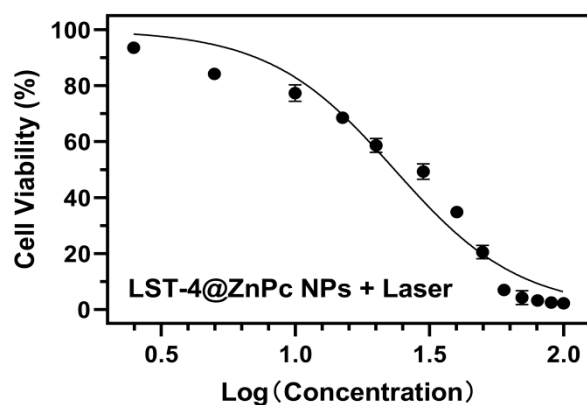

**Figure S54.** The dose-dependent inhibition curves of LST-4@ZnPc NPs upon exposure to laser radiation (a 690 nm laser (0.2 W/cm<sup>2</sup>, 5 min)) (The unit of concentration: µg/mL) (n=4).

Table S1. Loading Efficiency of ZnPc in LST-4@ZnPc NPs.

| No. | C <sub>ZnPc</sub> (µg/mL) | LE (%) | Average (%) | RSD (%) |
|-----|---------------------------|--------|-------------|---------|
| 1   | 1.0464                    | 71.75  | 74.442      | 1.95    |
| 2   | 1.0976                    | 75.262 |             |         |
| 3   | 1.1129                    | 76.315 |             |         |
